# Supplementary material for: Reliability and validity of the Polish version of the Achilles tendon Total Rupture Score
Source: Springer Nature journal article supplement (doi:10.1007/s00167-017-4764-7), 2017-11-01
Supplement: MOESM1 [file 15182970]

## Skala oceny po zerwaniu ścięgna Achillesa

Zakreślamy na poziomej linii w skali 0-10.

0- bez ograniczeń, 10- poważne ograniczenia

1. Czy masz jakieś ograniczenia związane z obniżeniem siły mięśni łydki/ścięgna Achillesa/stopy?

0 1 2 3 4 5 6 7 8 9 10

2. Czy masz jakieś ograniczenia związane z męczliwością mięśni łydki/ścięgna Achillesa/stopy?

0 1 2 3 4 5 6 7 8 9 10

3. Czy masz jakieś ograniczenia związane ze sztywnością mięśni łydki/ścięgna Achillesa/stopy?

0 1 2 3 4 5 6 7 8 9 10

4. Czy masz jakieś ograniczenia związane z bólem mięśni łydki/ścięgna Achillesa/stopy?

0 1 2 3 4 5 6 7 8 9 10

5. Czy masz jakieś ograniczenia w codziennej aktywności?

0 1 2 3 4 5 6 7 8 9 10

6. Czy masz jakieś ograniczenia podczas chodzenia na nierównym podłożu?

0 1 2 3 4 5 6 7 8 9 10

7. Czy masz jakieś ograniczenia podczas szybkiego wchodzenia po schodach/chodzeniu pod górę?

0 1 2 3 4 5 6 7 8 9 10

8. Czy masz jakieś ograniczenia w bieganiu?

0 1 2 3 4 5 6 7 8 9 10

9. Czy masz jakieś ograniczenia w skakaniu?

0 1 2 3 4 5 6 7 8 9 10

10. Czy masz jakieś ograniczenia w wykonywaniu ciężkiej pracy fizycznej?

0 1 2 3 4 5 6 7 8 9 10
